# Supplementary material for: Current Practices and Knowledge of Adenosine Administration for Paroxysmal Supraventricular Tachycardia: A Multi-Province Survey in Chinese Emergency Departments
Source: Research Square preprint supplement (doi:10.21203/rs.3.rs-6509758/v1), 2025-05-22
Supplement: Supplementary file 1 [file fb7e9a3f1cfc723eaa5f1bac.docx]

Survey on the current status of treatment of tachycardia in the emergency room

Basic Information

2. Your gender: [Single-choice question] *

○Male ○Female

3. Your age group: [Single-choice question] *

○Under 18 ○18~25 ○26~30 ○31~40

○41~50 ○51~60 ○60 and above

4. The level of the hospital you work in is [single choice question] *

○Level 3A

○Level 3B

○Level 2A

○Level 2B

○Others (please specify) _________________

5. Your job title [single choice] *

○Chief Physician

○Deputy Chief Physician

○Attending Physician

○Resident Physician

6. How many years have you worked in the emergency department? [Single-choice question] *

○ Less than 3 years

○3-5 years

○5-10 years

○10-15 years

○15 years and above

7. Your educational background: [Single-choice question] *

○Junior high school and below

○High school/technical secondary school

○College

○Undergraduate

○Graduate students and above

8. Your city: [Fill in the blank] *

Adenosine Use Cognitive Components

9. The treatments you have used for supraventricular tachycardia include [multiple choice] *

□Eyeball compression method

□Induce vomiting

□ Carotid sinus massage

□Valsalva maneuver

□Adenosine

□Adenosine triphosphate (ATP)

□Propafenone

□Amiodarone

□Ibutilide

□Diltiazem

□Esmolol

□Verapamil

□Synchronized cardioversion

□Asynchronous cardioversion

□Others (please specify) _________________

10. Contraindications to adenosine use include [multiple choice] *

□Adenosine allergy

□ Bronchial asthma

□ Preexcitation syndrome

□Height AVB

□ History of sick sinus disease

□ Heart failure

□Hemodynamic instability

□Others (please specify) _________________

11. Adverse reactions of adenosine include [Multiple choice] *

□Chest tightness, difficulty breathing

□Chest pain

□Flustered, palpitations

□ Cardiac arrest (cardiopulmonary resuscitation required)

□ Dizziness

□Headache

□ Nausea

□ Vomiting

□ Low blood pressure

□Others (please specify) _________________

12. Does your hospital pharmacy have adenosine? [Single-choice question] *

○ Yes

○None (Please skip to the end of the questionnaire and submit your answer sheet)

13. Does your department's emergency room have adenosine backup drugs? [Single-choice question] *

○Yes

○None

14. Have you ever used adenosine? [Single-choice question] *

Yes

○No

15. Do you prefer adenosine to correct supraventricular tachycardia? [Single-choice question] *

Yes

○ No, physical stimulation of the vagus nerve was ineffective after trying it

○No, other antiarrhythmic drugs are ineffective

○No, other situations (please explain) _________________

16. If adenosine is not used and recovery is not achieved, the treatment method tried is [single choice question] *

○Eyeball compression method

○ Induce vomiting

○ Carotid sinus massage

○Valsalva maneuver

○Adenosine triphosphate

○Propafenone

○Amiodarone

○Ibutilide

○Diltiazem

○Esmolol

○Verapamil

○Synchronized cardioversion

○Asynchronous cardioversion

○Others (please specify) _________________

17. What do you think is the most effective drug treatment for supraventricular tachycardia? [Single-choice question] *

○Adenosine

○Adenosine triphosphate (ATP)

○Propafenone

○Amiodarone

○Ibutilide

○Diltiazem

○Esmolol

○Verapamil

○Others (please specify) _________________

18. What do you think is the safest drug treatment for supraventricular tachycardia? [Single-choice question] *

○Adenosine

○Adenosine triphosphate (ATP)

○Propafenone

○Amiodarone

○Ibutilide

○Diltiazem

○Esmolol

○Verapamil

○Synchronized cardioversion

○Asynchronous cardioversion

○Others (please specify) _________________

19. Which of the following do you think is the most appropriate way to treat supraventricular tachycardia with adenosine for the first time? [Single-choice question] *

○Adenosine, 6 mg, IV bolus

○ Adenosine, 6 mg + 50 ml saline, intravenous pump

○Adenosine, 12 mg, IV bolus

○Adenosine, 20 mg, IV bolus

○ Adenosine, 20 mg + 50 ml saline, intravenous pump
